# Supplementary material for: Genome sequence and population declines in the critically endangered greater bamboo lemur (Prolemur simus) and implications for conservation
Source: PubMed Central journal article supplement (PMC5994045; doi:10.1186/s12864-018-4841-4), 2018-06-08

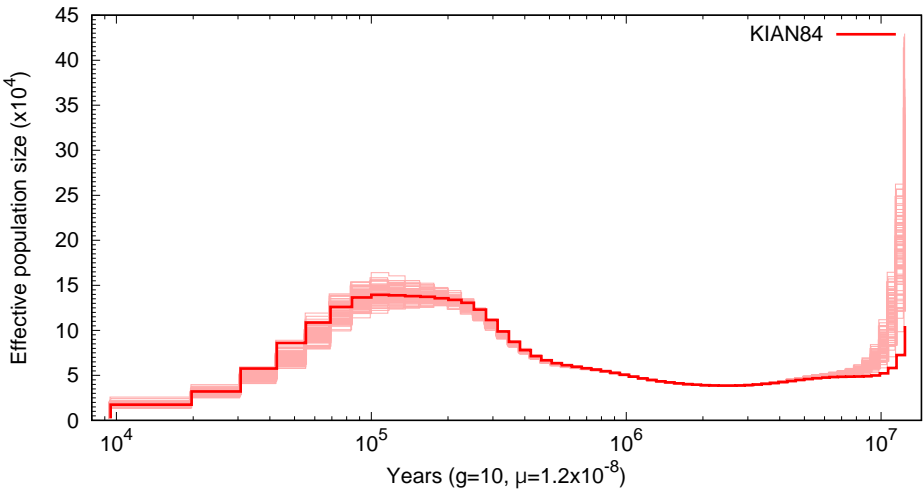

Supplement: 12864_2018_4841_MOESM12_ESM.pdf [file 12864_2018_4841_MOESM12_ESM.pdf]
