# Supplementary material for: Genome sequence and population declines in the critically endangered greater bamboo lemur (Prolemur simus) and implications for conservation
Source: PubMed Central journal article supplement (PMC5994045; doi:10.1186/s12864-018-4841-4), 2018-06-08
Supplement: 12864_2018_4841_MOESM13_ESM.pdf [file 12864_2018_4841_MOESM13_ESM.pdf]

# Legend

- Extant Distribution
- Estimated Range from 2005 forest
- Estimated Range from 1950s forest
- MCP\_Clip1950\_500m
- MCP\_Clip1950\_1k
- MCP\_Clip1950\_5k
- MCP
- 2005 forest cover
- 1950's forest cover
- Museum Specimens
- Subfossil Cave Sites
- Hapalemur Outgroup
- Sampled Individuals

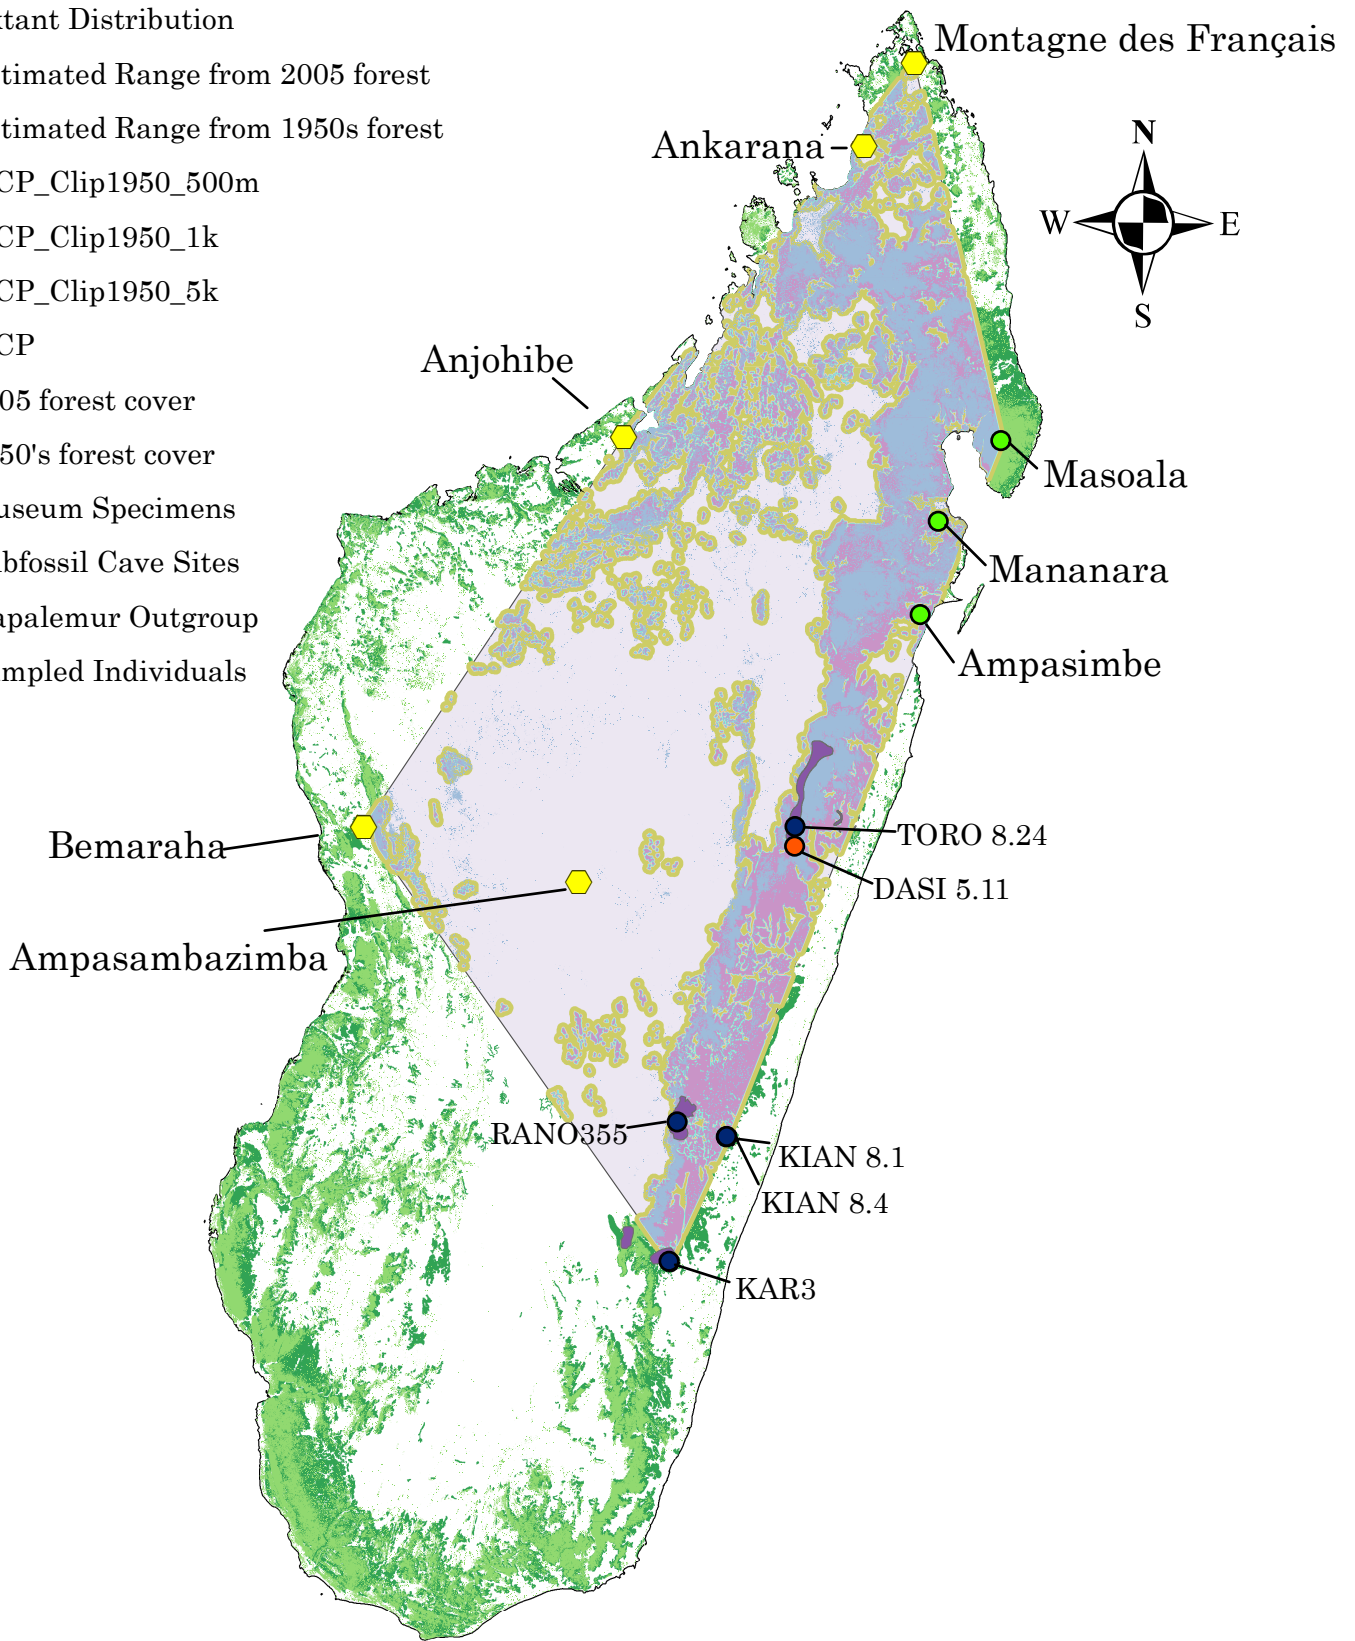

0 45 90 180 270 360 Kilometers
